# Supplementary material for: A scientific note on a new pest for European honeybees: first report of small hive beetle Aethina tumida, (Coleoptera: Nitidulidae) in Italy
Source: Springer Nature journal article supplement (doi:10.1007/s13592-014-0343-9), 2014-12-23
Supplement: MOESM1 [file 13592_2014_343_MOESM1_ESM.pdf]

**A new pest for European honeybees: first report of small hive beetle (*Aethina tumida*, (Coleoptera: Nitidulidae) in Italy**

Vincenzo PALMERI, Giuseppe SCIRTÒ, Antonino MALACRINÒ, Francesca LAUDANI, Orlando CAMPOLO\*

\*Corresponding Author: Orlando Campolo - Dipartimento di AGRARIA, Università "Mediterranea" of Reggio Calabria, loc Feo di Vito - 89100 - Reggio Calabria, Italy email: orlando.campolo@unirc.it. Telephone and fax: +39 0965 801409

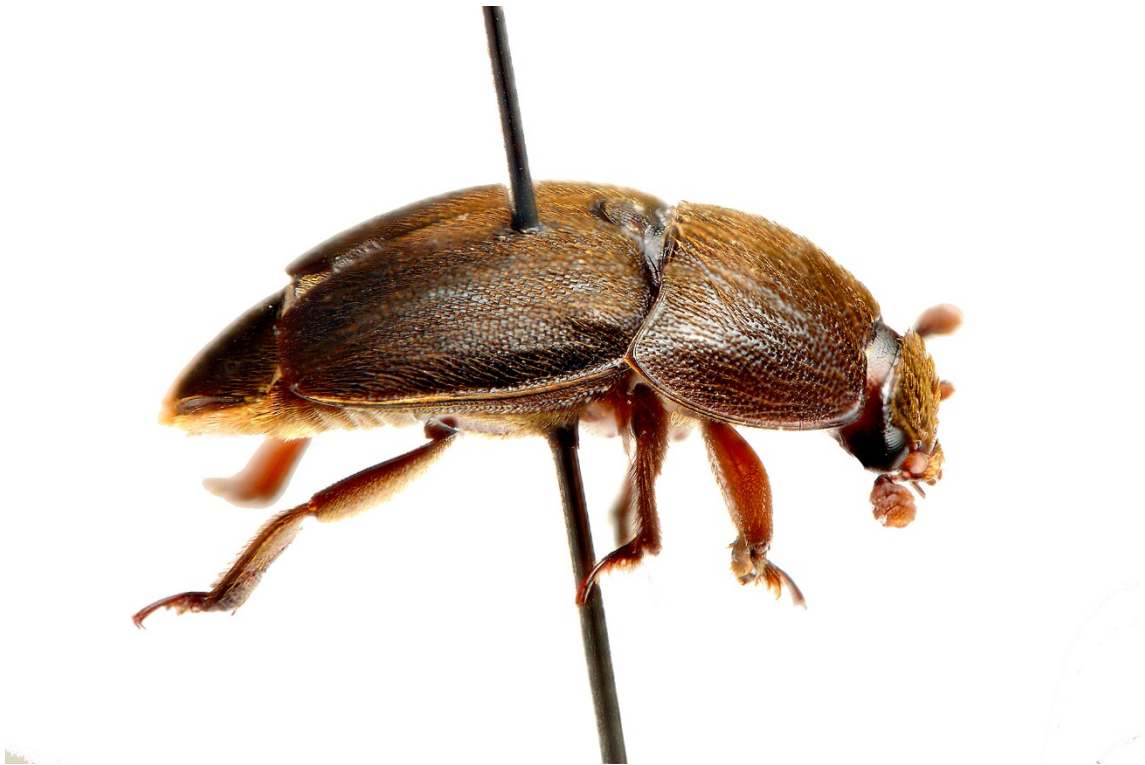

**Fig. S1.** Lateral view of *Aethina tumida* adult found in the infested hives

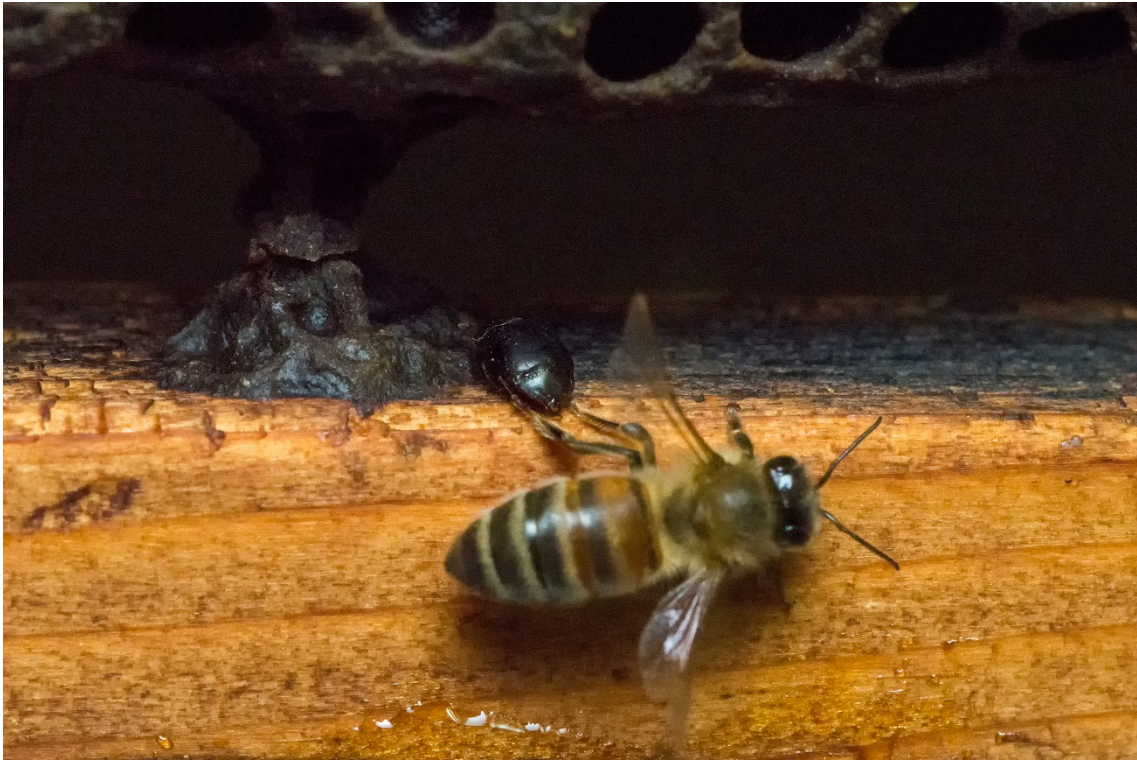

**Fig. S2.** *Aethina tumida* adult and honeybee worker

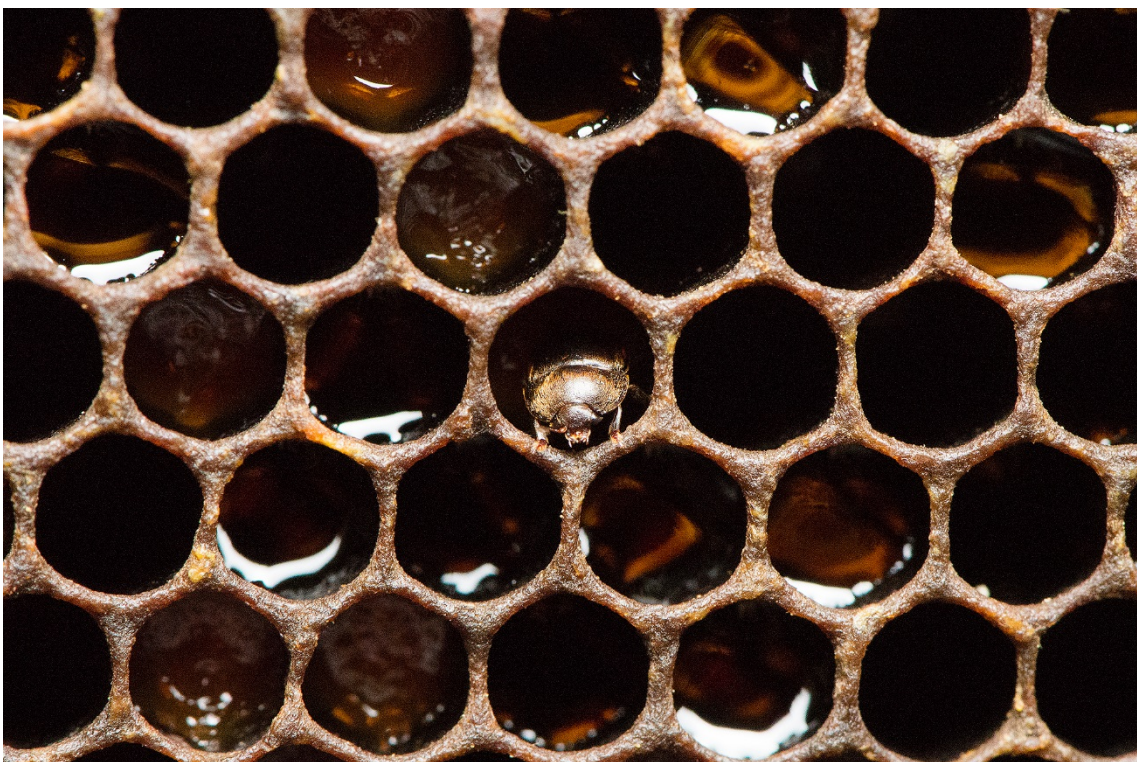

**Fig. S3.** *Aethina tumida* adult inside a cell
